# Supplementary material for: Prevalence of Viral Hepatitis B, C, and D in Kazakhstan
Source: ScientificWorldJournal. 2022 Apr 22;2022:9102565. doi: 10.1155/2022/9102565 (PMC9054462; doi:10.1155/2022/9102565)
Supplement: Supplementary Materials — Appendix 1: the prevalence of viral hepatitis B, D, and C for 2015 by regions of the Republic of Kazakhstan. Appendix 2: the prevalence of viral hepatitis B, D, and C for 2020 by regions of the Republic of Kazakhstan. [file 9102565.f1.zip]

Archive with 2 entries (2 files):
- 9102565.f1/Appendix 1.docx
- 9102565.f1/Appendix 2.docx
